# Supplementary material for: PTCH1 +/− Dermal Fibroblasts Isolated from Healthy Skin of Gorlin Syndrome Patients Exhibit Features of Carcinoma Associated Fibroblasts
Source: PubMed Central journal article supplement (PMC2654107; doi:10.1371/journal.pone.0004818), 2009-03-16

Figure S1

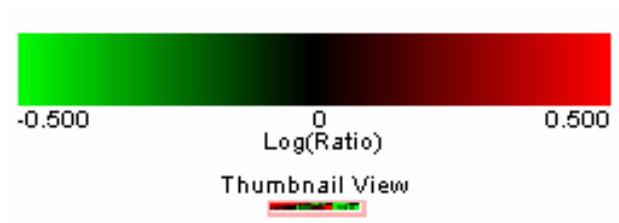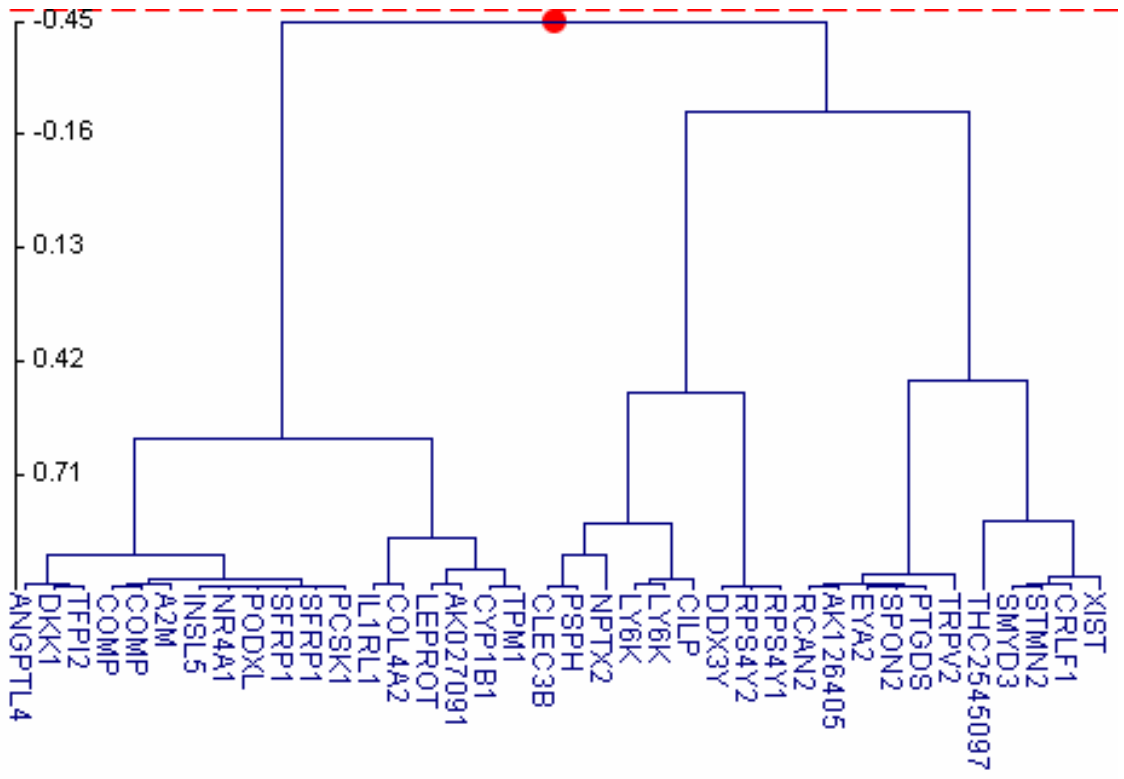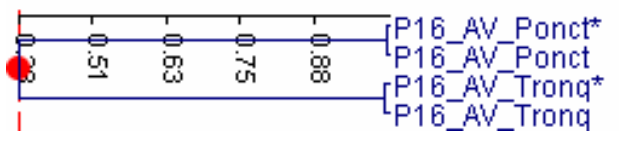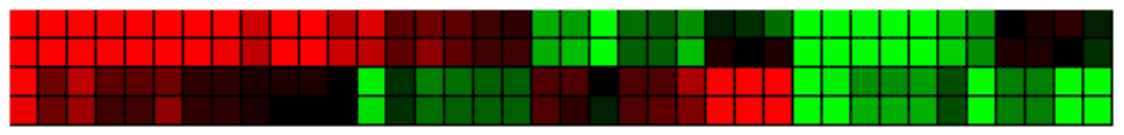

Supplement: pone.0004818.s001.pdf [file pone.0004818.s001.pdf]
