# Supplementary material for: PTCH1 +/− Dermal Fibroblasts Isolated from Healthy Skin of Gorlin Syndrome Patients Exhibit Features of Carcinoma Associated Fibroblasts
Source: PubMed Central journal article supplement (PMC2654107; doi:10.1371/journal.pone.0004818), 2009-03-16
Supplement: pone.0004818.s002.pdf [file pone.0004818.s002.pdf]

Table S1

| Primary Sequence Name | Accession Number | missense pool |          | nonsense pool |          |
|-----------------------|------------------|---------------|----------|---------------|----------|
|                       |                  | Fold Change   | p-value  | Fold Change   | p-value  |
| MMP3                  | NM_002422        | 19.7421       | 0        | 13.0139       | 0        |
| CLIC6                 | NM_053277        | 18.5676       | 1.72E-35 | 7.711         | 3.54E-13 |
| KCNJ8                 | NM_004982        | 12.2448       | 0        | 10.1035       | 5.14E-32 |
| COL11A1               | NM_080629        | 9.7967        | 9.06E-22 | 5.4611        | 4.28E-14 |
| IL13RA2               | NM_000640        | 8.9084        | 0        | 4.6296        | 2.00E-19 |
| A2M                   | NM_000014        | 8.6147        | 0        | 1.7405        | 2.44E-06 |
| MMP1                  | NM_002421        | 8.4122        | 0        | 7.8028        | 0        |
| ANGPTL4               | NM_139314        | 7.5098        | 0        | 3.1122        | 0        |
| A_23_P170719          |                  | 6.1947        | 0        | 2.6836        | 3.10E-24 |
| TFPI2                 | AK129833         | 6.1688        | 4.05E-40 | 2.4071        | 1.13E-06 |
| A_32_P75141           |                  | 6.1635        | 0        | 4.9618        | 0        |
| ALDH1A3               | NM_000693        | 5.92          | 0        | 10.883        | 0        |
| FLJ14834              | NM_032849        | 5.8414        | 0        | 2.7641        | 6.60E-32 |
| SMOC2                 | NM_022138        | 5.5702        | 6.90E-20 | 2.788         | 4.85E-06 |
| TFPI2                 | NM_006528        | 5.533         | 0        | 2.0953        | 5.21E-21 |
| PRL                   | NM_000948        | 5.4189        | 0        | 2.484         | 2.42E-15 |
| AI476245              | AI476245         | 5.1206        | 0        | 3.0481        | 3.41E-17 |
| APBB1IP               | NM_019043        | 4.6804        | 0        | 3.7532        | 2.47E-40 |
| GHR                   | NM_000163        | 4.5814        | 9.60E-26 | 3.0934        | 4.03E-06 |
| BX537788              | BX537788         | 4.3842        | 9.63E-37 | 3.408         | 1.22E-15 |
| DHRS3                 | NM_004753        | 4.3342        | 0        | 3.7553        | 3.85E-33 |
| NR4A3                 | NM_173200        | 4.2339        | 0        | 2.1442        | 3.44E-11 |
| MGST1                 | NM_145791        | 3.9293        | 0        | 2.5332        | 2.55E-24 |
| A_24_P289854          |                  | 3.7382        | 7.02E-36 | 3.5528        | 3.95E-18 |
| CPM                   | NM_001874        | 3.715         | 0        | 2.1577        | 1.14E-25 |
| NANOS1                | NM_199461        | 3.609         | 3.75E-13 | 2.6956        | 5.74E-12 |
| PPAP2A                | NM_176895        | 3.5108        | 6.87E-38 | 2.23          | 1.83E-35 |
| PCSK5                 | NM_006200        | 3.4846        | 0        | 2.1278        | 1.36E-09 |
| GPC6                  | BX640888         | 3.4137        | 7.47E-36 | 2.405         | 7.60E-21 |
| DKK1                  | NM_012242        | 3.3686        | 0        | 1.6358        | 3.03E-26 |
| MASP1                 | NM_139125        | 3.2252        | 1.34E-21 | 3.421         | 3.33E-18 |
| SPOCK1                | NM_004598        | 3.1251        | 0        | 3.3341        | 0        |
| CPM                   | NM_001874        | 3.1094        | 2.52E-19 | 2.0461        | 5.08E-08 |
| FMOD                  | NM_002023        | 3.1081        | 0        | 1.8023        | 2.31E-16 |
| KCTD15                | NM_024076        | 3.0865        | 1.44E-21 | 3.0498        | 1.42E-19 |
| SAA1                  | NM_000331        | 3.048         | 0        | 2.1112        | 1.25E-21 |
| SNCA                  | NM_007308        | 3.0297        | 3.71E-30 | 2.5018        | 7.41E-09 |
| MGC42157              | BC030111         | 2.9857        | 0        | 2.759         | 1.59E-22 |
| CA12                  | NM_001218        | 2.9836        | 0        | 2.1333        | 0        |
| A_24_P752362          |                  | 2.9768        | 8.03E-23 | 2.8958        | 2.09E-34 |
| THC2140046            | BG428517         | 2.927         | 0        | 2.0764        | 1.36E-24 |
| STEAP1                | NM_012449        | 2.9091        | 0        | 2.3808        | 7.46E-35 |
| AKR1C1                | NM_001353        | 2.8883        | 0        | 2.3474        | 1.23E-39 |
| HSPA5BP1              | NM_017870        | 2.8592        | 5.23E-18 | 2.2717        | 4.12E-15 |
| STEAP1                | NM_012449        | 2.8538        | 0        | 2.2024        | 2.10E-39 |
| AKR1C1                | NM_001353        | 2.8523        | 5.59E-37 | 2.4218        | 7.18E-21 |
| AF264625              | AF264625         | 2.8355        | 7.77E-28 | 2.8518        | 2.37E-25 |
| PTGIS                 | NM_000961        | 2.8252        | 5.37E-22 | 2.7335        | 2.82E-23 |
| STEAP2                | NM_152999        | 2.8101        | 7.94E-37 | 2.2325        | 1.10E-09 |
| CXCL12                | NM_199168        | 2.8062        | 1.10E-34 | 2.5629        | 5.33E-25 |
| A_24_P647682          |                  | 2.699         | 3.75E-26 | 2.6545        | 1.51E-15 |
| CDON                  | AK022986         | 2.6989        | 2.02E-19 | 2.2717        | 1.60E-08 |
| LOC387763             | BC052560         | 2.6507        | 3.76E-34 | 1.7848        | 1.72E-07 |
| DPP3                  | NM_130443        | 2.6339        | 8.64E-18 | 2.6929        | 3.39E-17 |
| SLC39A8               | NM_022154        | 2.6101        | 3.18E-11 | 2.0025        | 9.21E-07 |
| EFEMP1                | NM_004105        | 2.5939        | 0        | 1.5247        | 1.01E-10 |
| BC062473              | BC062473         | 2.5805        | 4.85E-40 | 1.7842        | 1.50E-20 |
| AW946823              | AW946823         | 2.5737        | 1.71E-14 | 2.0896        | 7.27E-08 |
| CTHRC1                | NM_138455        | 2.5446        | 5.94E-20 | 1.6947        | 4.59E-07 |
| ADFP                  | NM_001122        | 2.5132        | 4.54E-17 | 2.0442        | 4.12E-07 |
| WISP2                 | NM_003881        | 2.5103        | 1.30E-23 | 2.1266        | 6.04E-18 |
| A_24_P934306          |                  | 2.4805        | 7.54E-15 | 2.6047        | 3.08E-11 |
| SAA2                  | NM_030754        | 2.4569        | 0        | 1.9001        | 4.05E-15 |
| COL12A1               | NM_004370        | 2.3825        | 9.44E-37 | 1.6513        | 4.51E-10 |
| TUBA1                 | NM_006000        | 2.3766        | 3.08E-27 | 2.0994        | 7.09E-10 |
| CCRL1                 | NM_178445        | 2.3757        | 1.12E-18 | 2.4162        | 1.81E-26 |
| AA417913              | AA417913         | 2.37          | 3.52E-19 | 2.409         | 1.49E-29 |
| AKR1C3                | NM_003739        | 2.3671        | 8.04E-21 | 2.3569        | 7.55E-24 |
| CMTM1                 | NM_181289        | 2.3129        | 3.71E-31 | 2.3448        | 1.11E-25 |
| FGF7                  | NM_002009        | 2.3002        | 8.39E-30 | 1.5897        | 2.05E-18 |
| FLJ30435              | NM_174950        | 2.284         | 6.79E-22 | 1.4957        | 5.59E-07 |
| EXOSC6                | NM_058219        | 2.2792        | 0        | 2.3187        | 1.12E-44 |
| ID2                   | NM_002166        | 2.2761        | 7.96E-41 | 1.6009        | 7.44E-17 |
| SMAD3                 | NM_005902        | 2.2706        | 2.19E-25 | 1.8951        | 4.67E-18 |
| DSCR1                 | NM_004414        | 2.2516        | 1.42E-10 | 2.4037        | 1.24E-11 |
| UCHL1                 | NM_004181        | 2.2284        | 0        | 1.7156        | 1.55E-25 |

|                 |           |        |          |         |          |
|-----------------|-----------|--------|----------|---------|----------|
| ADARB1          | NM_015833 | 2.2018 | 6.96E-29 | 2.4494  | 6.38E-38 |
| KIAA0644        | AB014544  | 2.1862 | 1.50E-13 | 1.6568  | 9.87E-06 |
| PLS3            | NM_005032 | 2.1629 | 2.04E-41 | 1.3926  | 2.64E-09 |
| LCE2A           | NM_178428 | 2.1528 | 2.54E-35 | 2.0718  | 2.23E-17 |
| BC035260        | BC035260  | 2.1041 | 3.96E-12 | 2.4093  | 6.50E-09 |
| QPCT            | NM_012413 | 2.1039 | 8.56E-24 | 1.3834  | 3.07E-07 |
| PITPNC1         | NM_181671 | 2.0932 | 4.25E-08 | 2.0012  | 3.73E-06 |
| ATP6V1B2        | NM_001693 | 2.045  | 8.66E-17 | 2.0845  | 6.81E-15 |
| MGP             | NM_000900 | 2.0449 | 1.75E-14 | 1.4459  | 1.58E-07 |
| QPCT            | NM_012413 | 2.0333 | 1.26E-42 | 1.3246  | 5.90E-06 |
| SAMD10          | NM_080621 | 2.0178 | 6.03E-27 | 1.9777  | 9.01E-38 |
| ANGPTL2         | NM_012098 | 2.0155 | 2.91E-14 | 1.6564  | 6.67E-08 |
| GALNTL2         | NM_054110 | 2.0129 | 9.76E-41 | 1.5649  | 8.93E-09 |
| AJ276555        | AJ276555  | 2.0098 | 5.57E-16 | 2.046   | 4.57E-20 |
| ABCC3           | NM_003786 | 1.9821 | 1.14E-09 | 1.6254  | 6.40E-08 |
| EMP2            | NM_001424 | 1.9756 | 4.75E-20 | 1.7299  | 2.52E-22 |
| SAT             | NM_002970 | 1.9729 | 1.26E-21 | 1.7193  | 3.93E-10 |
| SYNPO           | AB028952  | 1.9568 | 4.59E-14 | 2.0189  | 3.50E-21 |
| SFRP2           | NM_003013 | 1.9555 | 4.84E-28 | 2.5881  | 3.79E-33 |
| PGM1            | NM_002633 | 1.9421 | 9.20E-14 | 1.9195  | 9.82E-17 |
| ITGB5           | NM_002213 | 1.9381 | 2.75E-17 | 1.5957  | 4.74E-07 |
| AMID            | NM_032797 | 1.902  | 7.82E-21 | 1.5964  | 8.03E-07 |
| ID2             | NM_002166 | 1.8965 | 7.60E-19 | 1.3594  | 2.40E-06 |
| THBD            | NM_000361 | 1.8919 | 1.34E-08 | 1.9982  | 1.26E-07 |
| CUGBP2          | NM_006561 | 1.8895 | 7.44E-24 | 1.8691  | 2.36E-28 |
| MAB21L2         | NM_006439 | 1.888  | 3.08E-13 | 1.8594  | 2.71E-20 |
| SAT             | NM_002970 | 1.8807 | 3.42E-28 | 1.7576  | 9.58E-19 |
| HIG2            | NM_013332 | 1.8775 | 1.12E-44 | 1.4082  | 1.38E-13 |
| BNIP3           | NM_004052 | 1.8772 | 2.21E-27 | 1.411   | 6.29E-09 |
| GREM1           | NM_013372 | 1.8693 | 4.03E-14 | 1.7254  | 4.64E-15 |
| KIAA0664        | NM_015229 | 1.857  | 1.91E-31 | 1.8454  | 3.04E-32 |
| SOX4            | NM_003107 | 1.8556 | 9.70E-14 | 1.6116  | 3.56E-08 |
| THC2104265      | AI358607  | 1.8521 | 1.36E-20 | 1.7994  | 1.51E-29 |
| ANXA6           | NM_001155 | 1.8518 | 2.33E-17 | 1.6998  | 1.91E-09 |
| SFRP2           | NM_003013 | 1.8437 | 1.14E-37 | 2.5863  | 0        |
| BX537732        | BX537732  | 1.8139 | 2.50E-13 | 1.6883  | 1.52E-10 |
| AA516273        | AA516273  | 1.8088 | 1.28E-06 | 1.7599  | 3.24E-07 |
| BC031278        | BC031278  | 1.7963 | 4.22E-22 | 1.7613  | 1.68E-26 |
| COL12A1         | NM_004370 | 1.783  | 4.86E-15 | 1.6408  | 1.47E-10 |
| DPYSL4          | NM_006426 | 1.7711 | 6.96E-10 | 1.61    | 1.01E-07 |
| CD44            | NM_000610 | 1.7313 | 1.91E-12 | 1.5131  | 5.27E-06 |
| LEPROT          | NM_017526 | 1.727  | 7.73E-16 | -1.5699 | 5.37E-11 |
| C1orf42         | NM_019060 | 1.7216 | 1.16E-12 | 1.6265  | 1.08E-09 |
| C1GALT1C1       | NM_152692 | 1.7104 | 7.56E-18 | 1.4669  | 1.64E-09 |
| LMOD1           | NM_012134 | 1.709  | 8.39E-10 | 1.7694  | 8.53E-10 |
| EMP2            | AK096403  | 1.7085 | 8.01E-14 | 1.6664  | 1.39E-16 |
| E2IG5           | NM_014367 | 1.7059 | 6.19E-18 | 1.3819  | 1.00E-07 |
| THC2100006      |           | 1.6642 | 6.75E-12 | 1.6337  | 4.60E-09 |
| C20orf19        | NM_018474 | 1.6635 | 1.96E-12 | 1.5786  | 1.30E-10 |
| EMX2OS          | AY117034  | 1.6578 | 5.59E-11 | 1.8749  | 5.76E-16 |
| BASP1           | NM_006317 | 1.6281 | 4.33E-10 | 1.6043  | 4.29E-09 |
| NT5E            | NM_002526 | 1.6194 | 1.80E-08 | 1.7122  | 1.21E-10 |
| CDH13           | NM_001257 | 1.611  | 7.47E-07 | 2.1522  | 2.60E-15 |
| SOD2            | NM_000636 | 1.6025 | 1.15E-19 | 1.7405  | 1.10E-20 |
| SMPDL3A         | NM_006714 | 1.5995 | 1.41E-15 | 1.396   | 6.76E-07 |
| AOX1            | NM_001159 | 1.5893 | 1.80E-18 | 1.5901  | 3.26E-19 |
| CARHSP1         | NM_014316 | 1.5807 | 7.01E-06 | 1.8301  | 3.00E-13 |
| BTG1            | NM_001731 | 1.5781 | 7.71E-08 | 1.6958  | 4.54E-07 |
| SVEP1           | AK075235  | 1.5754 | 9.36E-13 | 1.5834  | 9.27E-17 |
| TNXB            | NM_019105 | 1.5661 | 3.94E-07 | 2.8929  | 8.75E-36 |
| CYR61           | NM_001554 | 1.5646 | 9.26E-24 | 1.2641  | 2.19E-08 |
| GPT             | NM_005309 | 1.5459 | 3.93E-25 | 1.5546  | 3.00E-16 |
| HSPB2           | NM_001541 | 1.5429 | 1.13E-08 | 1.43    | 3.40E-07 |
| KLF6            | NM_001300 | 1.5373 | 4.44E-23 | 1.3389  | 9.78E-10 |
| EMX2            | NM_004098 | 1.5242 | 5.28E-06 | 1.7484  | 1.71E-08 |
| NDN             | NM_002487 | 1.5226 | 2.98E-08 | 1.5537  | 1.53E-09 |
| KRTAP5-8        | NM_021046 | 1.522  | 3.46E-13 | 1.4603  | 6.31E-09 |
| THC2230875      |           | 1.5103 | 2.79E-13 | 1.4767  | 8.09E-13 |
| X68990          | X68990    | 1.5084 | 6.73E-16 | 1.4834  | 1.07E-16 |
| RECK            | NM_021111 | 1.508  | 1.12E-06 | 1.455   | 2.05E-07 |
| GLRX            | NM_002064 | 1.5039 | 8.74E-20 | 1.3365  | 1.71E-08 |
| DIRC1           | NM_052952 | 1.5025 | 6.06E-20 | 1.421   | 4.71E-09 |
| PDPN            | NM_006474 | 1.5016 | 6.68E-07 | 1.9428  | 1.23E-26 |
| PAM             | NM_000919 | 1.4992 | 1.03E-11 | 1.497   | 1.55E-09 |
| FKBP10          | NM_021939 | 1.4919 | 3.32E-11 | 1.4244  | 6.35E-11 |
| EDARADD         | NM_145861 | 1.4836 | 7.08E-11 | 1.339   | 1.16E-10 |
| TNFAIP2         | NM_006291 | 1.4815 | 2.03E-18 | 1.4017  | 3.86E-08 |
| ENST00000296496 | CR597270  | 1.472  | 2.94E-08 | 1.2854  | 7.44E-06 |
| CD99            | NM_002414 | 1.4622 | 3.18E-09 | 1.3388  | 7.41E-10 |

|              |              |         |          |         |          |
|--------------|--------------|---------|----------|---------|----------|
| MT           | NM_014507    | 1.4584  | 5.18E-20 | 1.3918  | 6.95E-11 |
| PRSS36       | NM_173502    | 1.4489  | 9.07E-11 | 1.4285  | 2.60E-14 |
| IL27         | NM_145659    | 1.4436  | 1.07E-13 | 1.3817  | 2.70E-11 |
| AF155662     | AF155662     | 1.4373  | 1.26E-07 | 1.5008  | 4.04E-10 |
| PAM          | NM_000919    | 1.4362  | 3.12E-14 | 1.4177  | 5.03E-10 |
| REV3L        | NM_002912    | 1.4361  | 1.75E-06 | 1.5779  | 6.18E-07 |
| ZFP36L2      | NM_006887    | 1.4351  | 3.82E-16 | 1.4675  | 2.11E-17 |
| SGCE         | NM_003919    | 1.4298  | 9.05E-08 | 1.4387  | 8.35E-06 |
| RPLP0        | BF570115     | 1.4295  | 1.79E-09 | 1.593   | 1.02E-09 |
| KIAA1199     | NM_018689    | 1.4213  | 8.36E-09 | 1.6891  | 4.35E-12 |
| LOC441245    | AK090474     | 1.4213  | 3.06E-10 | 1.3605  | 3.93E-10 |
| COPS2        | NM_004236    | 1.4181  | 2.95E-06 | 1.4172  | 1.64E-07 |
| EMILIN2      | NM_032048    | 1.4158  | 1.68E-13 | 1.4087  | 1.12E-13 |
| TNC          | NM_002160    | 1.4026  | 1.67E-10 | 1.3453  | 2.12E-06 |
| ZBED3        | NM_032367    | 1.4     | 2.62E-07 | 1.4781  | 6.17E-06 |
| ARL6IP5      | NM_006407    | 1.3919  | 8.81E-08 | 1.4065  | 1.34E-09 |
| DLST         | NM_001933    | 1.377   | 9.10E-13 | 1.4567  | 7.80E-15 |
| THC2088849   |              | 1.3662  | 5.54E-11 | 1.4553  | 5.50E-12 |
| FLJ11125     | AK001987     | 1.3603  | 6.21E-08 | 1.3274  | 2.94E-11 |
| PLA2G4A      | NM_024420    | 1.3564  | 2.86E-07 | 2.2496  | 0        |
| KIAA1199     | NM_018689    | 1.3422  | 1.19E-07 | 1.6131  | 1.63E-15 |
| BM921275     | BM921275     | 1.3403  | 3.58E-06 | 1.3433  | 2.70E-07 |
| A_24_P384210 |              | 1.3293  | 8.66E-10 | 1.2797  | 1.77E-06 |
| CYP1B1       | NM_000104    | 1.3155  | 1.74E-10 | -1.4357 | 6.11E-16 |
| COLEC12      | NM_030781    | 1.275   | 9.63E-07 | 1.8187  | 7.71E-17 |
| CTSB         | AK097384     | 1.2593  | 3.13E-07 | 1.4216  | 6.47E-08 |
| TPCN1        | AK000619     | 1.2438  | 1.53E-06 | 1.6269  | 8.66E-15 |
| RAB31        | NM_006868    | -1.2302 | 8.20E-06 | -1.4304 | 1.88E-09 |
| COL1A1       | NM_000088    | -1.2561 | 8.93E-07 | -1.4463 | 6.55E-13 |
| FBLN2        | NM_001998    | -1.259  | 9.61E-08 | -1.2602 | 4.53E-06 |
| HTRA1        | NM_002775    | -1.2794 | 7.07E-06 | -1.3294 | 1.33E-09 |
| C1orf188     | NM_173795    | -1.2827 | 8.52E-09 | -1.2649 | 2.08E-07 |
| PYCR1        | NM_153824    | -1.2966 | 6.64E-06 | -1.3304 | 3.66E-08 |
| FBN1         | NM_000138    | -1.3008 | 5.64E-09 | -1.3062 | 1.59E-06 |
| C6orf48      | NM_016947    | -1.317  | 9.10E-08 | -1.2647 | 2.96E-07 |
| SLC20A1      | NM_005415    | -1.3303 | 3.16E-11 | -1.2623 | 1.80E-06 |
| PRNP         | NM_000311    | -1.3309 | 5.69E-12 | -1.3382 | 1.51E-10 |
| SERP1        | NM_014445    | -1.3356 | 5.69E-08 | -1.3277 | 3.49E-06 |
| IL15         | NM_172174    | -1.3507 | 2.18E-10 | -1.3858 | 1.92E-06 |
| COL3A1       | NM_000090    | -1.3649 | 4.75E-11 | -1.3879 | 1.33E-07 |
| LY6K         | NM_017527    | -1.3724 | 1.36E-12 | 1.4197  | 7.08E-10 |
| LOC388610    | BC069216     | -1.3732 | 2.17E-07 | -1.3316 | 1.49E-10 |
| ADH1A        | NM_000667    | -1.3742 | 6.22E-06 | -1.3893 | 1.96E-08 |
| RAB31        | NM_006868    | -1.3985 | 1.65E-15 | -1.3186 | 1.12E-07 |
| LY6K         | NM_017527    | -1.4    | 5.68E-08 | 1.3563  | 8.97E-12 |
| CHST2        | NM_004267    | -1.4066 | 4.42E-07 | -1.6757 | 4.72E-08 |
| THC2051764   |              | -1.4189 | 3.56E-07 | -1.4977 | 6.31E-09 |
| ADAM12       | NM_003474    | -1.4238 | 2.64E-10 | -1.5128 | 4.89E-06 |
| C9orf150     | NM_203403    | -1.4285 | 7.33E-09 | -1.6064 | 1.34E-07 |
| WIPI1        | NM_017983    | -1.4296 | 2.05E-09 | -1.3844 | 3.39E-07 |
| COL3A1       | NM_000090    | -1.4326 | 6.65E-09 | -1.5389 | 5.69E-12 |
| THC2042343   |              | -1.437  | 5.90E-12 | -1.2269 | 4.42E-06 |
| NDUFA12      | NM_018838    | -1.4427 | 1.91E-10 | -1.3934 | 2.95E-08 |
| GRB10        | NM_001001555 | -1.4508 | 3.02E-16 | -1.3402 | 1.81E-06 |
| CXCL2        | NM_002089    | -1.4518 | 3.83E-08 | -2.0825 | 1.99E-08 |
| CR617391     | CR617391     | -1.4559 | 4.50E-09 | -1.8749 | 8.05E-27 |
| COL5A1       | NM_000093    | -1.4651 | 1.11E-13 | -1.7266 | 2.36E-26 |
| FDXR         | NM_004110    | -1.4703 | 1.18E-06 | -1.3251 | 4.18E-09 |
| LAYN         | NM_178834    | -1.4764 | 4.06E-07 | -1.4906 | 3.51E-13 |
| COL1A2       | NM_000089    | -1.4806 | 9.14E-12 | -1.3149 | 8.51E-08 |
| BAX          | NM_138764    | -1.4923 | 1.28E-07 | -1.3944 | 8.05E-07 |
| LOXL3        | NM_032603    | -1.4986 | 1.39E-07 | -2.0143 | 9.42E-27 |
| PDIA3        | NM_005313    | -1.5006 | 4.06E-08 | -1.5565 | 1.59E-07 |
| MALAT1       | BX538238     | -1.5079 | 9.29E-15 | -1.45   | 1.11E-12 |
| THC2054763   |              | -1.5113 | 2.97E-09 | -1.8521 | 2.73E-06 |
| GLT8D2       | NM_031302    | -1.5234 | 1.62E-09 | -1.5828 | 2.18E-06 |
| LRAP         | NM_022350    | -1.5236 | 1.47E-07 | -2.1474 | 2.18E-09 |
| C14orf147    | NM_138288    | -1.5243 | 1.08E-09 | -1.4347 | 4.55E-10 |
| PTPRK        | NM_002844    | -1.5308 | 8.24E-12 | -1.3486 | 3.46E-06 |
| ACOT2        | NM_006821    | -1.5324 | 2.26E-11 | -1.4288 | 1.39E-06 |
| LAMA2        | NM_000426    | -1.5328 | 2.11E-09 | -1.4533 | 7.55E-09 |
| ASNS         | NM_001673    | -1.5371 | 3.94E-20 | -1.4911 | 1.58E-15 |
| LOC389652    | XM_372040    | -1.5413 | 1.23E-11 | -1.5574 | 1.76E-15 |
| CDC42EP3     | NM_006449    | -1.5728 | 1.15E-07 | -1.5648 | 1.42E-10 |
| INHBB        | NM_002193    | -1.5886 | 8.37E-26 | -1.5278 | 1.13E-16 |
| AK055915     | AK055915     | -1.5952 | 4.73E-14 | -1.5486 | 1.08E-06 |
| MARVELD1     | NM_031484    | -1.5971 | 8.69E-11 | -1.6071 | 1.12E-09 |
| FST          | NM_013409    | -1.5995 | 1.22E-17 | -1.5192 | 1.61E-09 |
| TncRNA       | AK027191     | -1.6019 | 7.49E-11 | -1.4575 | 1.98E-13 |

|              |           |         |          |         |          |
|--------------|-----------|---------|----------|---------|----------|
| RUTBC3       | NM_015705 | -1.6092 | 3.51E-06 | -1.626  | 4.81E-07 |
| PHLDA1       | NM_007350 | -1.6221 | 6.42E-24 | -1.5427 | 1.52E-14 |
| PDGFRB       | NM_002609 | -1.6261 | 4.06E-20 | -1.4109 | 1.15E-12 |
| SCARB1       | NM_005505 | -1.6479 | 3.66E-21 | -1.6919 | 8.39E-15 |
| LOC442293    | XM_498178 | -1.6856 | 2.53E-10 | -1.6404 | 1.30E-07 |
| LRIG3        | NM_153377 | -1.6875 | 1.65E-17 | -1.4743 | 4.33E-10 |
| CLEC2B       | NM_005127 | -1.6982 | 8.23E-26 | -1.6084 | 8.22E-16 |
| ITGBL1       | NM_004791 | -1.716  | 9.16E-19 | -1.9716 | 1.56E-27 |
| CXCL1        | NM_001511 | -1.7183 | 3.77E-07 | -2.1977 | 6.06E-12 |
| BF213738     | BF213738  | -1.7398 | 4.65E-19 | -1.6952 | 4.92E-32 |
| BC066344     | BC066344  | -1.7401 | 2.21E-18 | -1.7629 | 3.65E-10 |
| FPR1         | NM_002029 | -1.741  | 9.19E-20 | -1.6412 | 2.19E-09 |
| PSAT1        | NM_058179 | -1.7732 | 1.28E-18 | -1.825  | 4.65E-21 |
| A_23_P255111 |           | -1.7949 | 4.89E-14 | -5.2354 | 0        |
| IGFBP7       | NM_001553 | -1.891  | 2.89E-06 | -6.0029 | 0        |
| CILP         | NM_003613 | -1.9239 | 2.27E-09 | 1.9266  | 3.45E-08 |
| CHST7        | NM_019886 | -1.9272 | 2.91E-26 | -2.4096 | 4.61E-28 |
| LFNG         | BC014851  | -1.9288 | 4.82E-12 | -1.6955 | 1.12E-06 |
| MUC20        | NM_152673 | -1.936  | 1.15E-06 | -2.4596 | 1.41E-21 |
| APOE         | NM_000041 | -1.9402 | 1.11E-42 | -1.3029 | 5.30E-08 |
| MLPH         | NM_024101 | -1.9409 | 1.83E-16 | -1.7616 | 1.33E-09 |
| AK026784     | AK026784  | -1.9424 | 1.36E-10 | -2.0477 | 5.27E-10 |
| AK075484     | AK075484  | -1.9695 | 9.44E-21 | -2.0015 | 6.05E-19 |
| AL359052     | AL359052  | -2.0027 | 7.30E-16 | -2.0856 | 1.69E-13 |
| SERPINF1     | NM_002615 | -2.0094 | 9.40E-09 | -1.6694 | 3.12E-06 |
| CLEC3B       | NM_003278 | -2.016  | 0        | 1.3543  | 2.05E-13 |
| THC2173240   |           | -2.0246 | 2.89E-09 | -1.6599 | 2.17E-10 |
| MRPS6        | NM_032476 | -2.0451 | 7.21E-12 | -1.6673 | 4.36E-11 |
| CHN1         | NM_001822 | -2.0453 | 1.34E-16 | -2.1094 | 4.55E-20 |
| LOC375295    | BC013438  | -2.0584 | 7.35E-12 | -2.4154 | 2.93E-16 |
| CH25H        | NM_003956 | -2.062  | 0        | -1.6382 | 4.24E-14 |
| THC2208133   | A1620901  | -2.0711 | 2.25E-11 | -1.9838 | 9.53E-08 |
| NET1         | NM_005863 | -2.1241 | 3.03E-31 | -1.4669 | 1.45E-08 |
| LUM          | NM_002345 | -2.1416 | 0        | -2.1803 | 3.21E-31 |
| SPSB2        | NM_032641 | -2.1485 | 1.91E-12 | -2.1705 | 1.94E-14 |
| IGFBP2       | NM_000597 | -2.1809 | 7.33E-30 | -4.2923 | 0        |
| CPT1C        | NM_152359 | -2.1895 | 5.27E-42 | -1.4124 | 8.16E-06 |
| DKFZp434L142 | NM_016613 | -2.2053 | 0        | -1.8556 | 1.41E-22 |
| BC037430     | BC037430  | -2.2074 | 4.78E-30 | -1.9038 | 7.93E-18 |
| pp9099       | NM_025201 | -2.2115 | 1.39E-20 | -1.5228 | 1.59E-07 |
| NOPE         | NM_020962 | -2.2406 | 6.31E-09 | -2.1367 | 1.82E-07 |
| RSPO3        | NM_032784 | -2.2446 | 4.25E-10 | -2.7686 | 1.58E-14 |
| TRPV2        | NM_016113 | -2.258  | 0        | -1.2706 | 9.04E-06 |
| MYLK         | NM_053025 | -2.2814 | 1.44E-16 | -2.2724 | 1.14E-17 |
| CSPG4        | NM_001897 | -2.3191 | 2.53E-16 | -1.9602 | 4.89E-07 |
| SFRS5        | NM_006925 | -2.334  | 1.06E-37 | -2.1145 | 1.68E-42 |
| MYLK         | NM_053025 | -2.3385 | 3.19E-12 | -2.1422 | 2.05E-09 |
| CSRP2        | NM_001321 | -2.3663 | 1.94E-30 | -1.6951 | 2.09E-13 |
| LOC375295    | BC013438  | -2.4275 | 3.41E-20 | -2.7879 | 1.25E-14 |
| EVC          | NM_014556 | -2.5052 | 1.34E-12 | -1.6697 | 7.79E-08 |
| MRPS6        | NM_032476 | -2.5203 | 1.31E-25 | -2.004  | 6.07E-23 |
| FLJ10157     | AK001019  | -2.5374 | 3.10E-10 | -3.7488 | 1.34E-18 |
| ZNF179       | NM_007148 | -2.5971 | 1.42E-25 | -1.7311 | 1.70E-06 |
| WNT5A        | NM_003392 | -2.9356 | 0        | -2.714  | 0        |
| CSEN         | NM_013434 | -3.072  | 0        | -2.0124 | 1.27E-29 |
| TBX5         | NM_000192 | -3.1129 | 3.38E-12 | -3.536  | 1.15E-07 |
| ADH4         | NM_000670 | -3.23   | 8.12E-12 | -3.827  | 4.91E-12 |
| BST2         | NM_004335 | -3.2752 | 0        | -3.0303 | 1.29E-15 |
| DKK3         | NM_013253 | -3.3895 | 6.82E-26 | -1.9717 | 3.39E-10 |
| DKK3         | NM_015881 | -3.5023 | 0        | -1.9682 | 1.97E-11 |
| COL23A1      | NM_173465 | -3.6652 | 7.01E-45 | -2.1148 | 4.82E-14 |
| AQP1         | NM_000385 | -3.6666 | 0        | -2.5611 | 2.90E-36 |
| PTGDS        | NM_000954 | -3.9356 | 0        | -1.9318 | 9.78E-25 |
| IFI27        | NM_005532 | -4.1376 | 7.34E-18 | -4.3466 | 4.27E-15 |
| IFI27        | NM_005532 | -4.1996 | 0        | -4.7571 | 0        |
| ECHDC3       | NM_024693 | -4.6909 | 1.88E-23 | -5.9668 | 1.37E-24 |
| EYA2         | NM_172113 | -4.8738 | 0        | -1.901  | 7.22E-10 |
| SPON2        | NM_012445 | -4.953  | 0        | -1.8769 | 5.91E-13 |
| TBX1         | NM_080647 | -5.1205 | 0        | -4.7772 | 0        |
| AK126405     | AK126405  | -5.9166 | 0        | -2.7683 | 0        |
| CPXM2        | NM_198148 | -5.9272 | 2.66E-44 | -2.223  | 7.27E-09 |
| TNFRSF19     | NM_148957 | -6.1012 | 6.96E-32 | -3.8355 | 9.09E-15 |
| THC2105523   |           | -7.1402 | 0        | -5.2897 | 0        |
| DSCR1L1      | NM_005822 | -9.6226 | 0        | -3.713  | 0        |
