# Supplementary material for: PTCH1 +/− Dermal Fibroblasts Isolated from Healthy Skin of Gorlin Syndrome Patients Exhibit Features of Carcinoma Associated Fibroblasts
Source: PubMed Central journal article supplement (PMC2654107; doi:10.1371/journal.pone.0004818), 2009-03-16
Supplement: pone.0004818.s003.pdf [file pone.0004818.s003.pdf]

Table S2

| Primary Sequence Name | Accession Number | missense pool |          | nonsense pool |          |
|-----------------------|------------------|---------------|----------|---------------|----------|
|                       |                  | Fold Change   | p-value  | Fold Change   | p-value  |
| CILP                  | NM_003613        | -1.9239       | 2.27E-09 | 1.9266        | 3.45E-08 |
| LY6K                  | NM_017527        | -1.3724       | 1.36E-12 | 1.4197        | 7.08E-10 |
| LY6K                  | NM_017527        | -1.4          | 5.68E-08 | 1.3563        | 8.97E-12 |
| CLEC3B                | NM_003278        | -2.016        | 0        | 1.3543        | 2.05E-13 |
| CYP1B1                | NM_000104        | 1.3155        | 1.74E-10 | -1.4357       | 6.11E-16 |
| LEPROT                | NM_017526        | 1.727         | 7.73E-16 | -1.5699       | 5.37E-11 |
