# Supplementary material for: PTCH1 +/− Dermal Fibroblasts Isolated from Healthy Skin of Gorlin Syndrome Patients Exhibit Features of Carcinoma Associated Fibroblasts
Source: PubMed Central journal article supplement (PMC2654107; doi:10.1371/journal.pone.0004818), 2009-03-16
Supplement: pone.0004818.s004.pdf [file pone.0004818.s004.pdf]

Table S3

| Primary Sequence Name | Sequence Description                                                                                              | Accession Number | Missense pool* | Missense pool | Nonsense pool* | Nonsense pool |
|-----------------------|-------------------------------------------------------------------------------------------------------------------|------------------|----------------|---------------|----------------|---------------|
| ANGPTL4               | angiotensin-like 4                                                                                                | NM_139314        | 7.462          | 7.558         | 3.268          | 2.977         |
| DKK1                  | dickkopf homolog 1 (Xenopus laevis)                                                                               | NM_012242        | 3.506          | 3.243         | 1.644          | 1.628         |
| TFPI2                 | tissue factor pathway inhibitor 2                                                                                 | NM_006528        | 5.77           | 5.317         | 2.241          | 1.969         |
| COMP                  | cartilage oligomeric matrix protein                                                                               | NM_000095        | 5.757          | 5.239         | 1.541          | 1.269         |
| COMP                  | cartilage oligomeric matrix protein                                                                               | NM_000095        | 6.001          | 4.613         | 1.532          | 1.28          |
| A2M                   | alpha-2-macroglobulin                                                                                             | NM_000014        | 8.545          | 8.687         | 1.603          | 1.834         |
| INSL5                 | insulin-like 5                                                                                                    | NM_005478        | 5.662          | 5.424         | 1.178          | 1.23          |
| NR4A1                 | nuclear receptor subfamily 4, group A, member 1                                                                   | NM_002135        | 3.232          | 2.969         | 1.165          | 1.172         |
| PODXL                 | podocalyxin-like                                                                                                  | NM_001018111     | 2.496          | 2.28          | 1.092          | 1.082         |
| SFRP1                 | secreted frizzled-related protein 1                                                                               | NM_003012        | 4.41           | 3.666         | 1.128          | 1.018         |
| SFRP1                 | secreted frizzled-related protein 1                                                                               | NM_003012        | 4.041          | 3.6           | 1.132          | 1.058         |
| PCSK1                 | proprotein convertase subtilisin/kexin type 1                                                                     | NM_000439        | 2.306          | 2.446         | 1.06           | 1.023         |
| IL1RL1                | interleukin 1 receptor-like 1                                                                                     | NM_016232        | 2.673          | 2.391         | -2.767         | -2.568        |
| COL4A2                | collagen, type IV, alpha 2                                                                                        | NM_001846        | 1.472          | 1.463         | -1.102         | -1.101        |
| LEPROT                | leptin receptor overlapping transcript                                                                            | NM_017526        | 1.648          | 1.814         | -1.649         | -1.501        |
| AK027091              | Homo sapiens cDNA: FLJ23438 fis, clone HRC13275. [AK027091]                                                       | AK027091         | 1.496          | 1.518         | -1.522         | -1.406        |
| CYP1B1                | cytochrome P450, family 1, subfamily B, polypeptide 1                                                             | NM_000104        | 1.32           | 1.311         | -1.431         | -1.44         |
| TPM1                  | tropomyosin 1 (alpha)                                                                                             | NM_001018004     | 1.218          | 1.265         | -1.369         | -1.37         |
| CLEC3B                | C-type lectin domain family 3, member B                                                                           | NM_003278        | -2.021         | -2.011        | 1.353          | 1.355         |
| PSPH                  | phosphoserine phosphatase                                                                                         | NM_004577        | -1.909         | -2.118        | 1.378          | 1.224         |
| NPTX2                 | neuronal pentraxin II                                                                                             | NM_002523        | -9.093         | -8.933        | 1.045          | -1.021        |
| LY6K                  | lymphocyte antigen 6 complex, locus K                                                                             | NM_017527        | -1.459         | -1.345        | 1.347          | 1.366         |
| LY6K                  | lymphocyte antigen 6 complex, locus K                                                                             | NM_017527        | -1.378         | -1.366        | 1.379          | 1.461         |
| CILP                  | cartilage intermediate layer protein, nucleotide pyrophosphohydrolase                                             | NM_003613        | -1.768         | -2.119        | 2.22           | 1.735         |
| DDX3Y                 | DEAD (Asp-Glu-Ala-Asp) box polypeptide 3, Y-linked                                                                | NM_004660        | -1.001         | 1.085         | 7.796          | 6.871         |
| RPS4Y2                | ribosomal protein S4, Y-linked 2                                                                                  | NM_001039567     | -1.141         | 1.053         | 48.763         | 48.704        |
| RPS4Y1                | ribosomal protein S4, Y-linked 1                                                                                  | NM_001008        | -1.477         | 1.15          | 50.953         | 76.205        |
| RCAN2                 | regulator of calcineurin 2                                                                                        | NM_005822        | -9.243         | -10.051       | -3.604         | -3.816        |
| AK126405              | Homo sapiens cDNA FLJ44441 fis, clone UTERU2020242. [AK126405]                                                    | AK126405         | -6.002         | -5.833        | -2.67          | -2.868        |
| EYA2                  | eyes absent homolog 2 (Drosophila)                                                                                | NM_172113        | -4.856         | -4.892        | -1.742         | -2.033        |
| SPON2                 | spondin 2, extracellular matrix protein                                                                           | NM_012445        | -4.633         | -5.33         | -1.729         | -2.05         |
| PTGDS                 | prostaglandin D2 synthase 21kDa (brain)                                                                           | NM_000954        | -3.978         | -3.895        | -1.858         | -2.011        |
| TRPV2                 | transient receptor potential cation channel, subfamily V, member 2                                                | NM_016113        | -2.251         | -2.265        | -1.248         | -1.292        |
| THC2545097            | IBP7_HUMAN (Q16270) Insulin-like growth factor-binding protein 7 precursor (IGFBP-7) (IBP-7) (IGF-binding protein |                  | -1.92          | -1.683        | -5.476         | -5.029        |
| SMYD3                 | SET and MYND domain containing 3                                                                                  | NM_022743        | 1.073          | 1.086         | -1.575         | -1.553        |
| STMN2                 | stathmin-like 2                                                                                                   | S82024           | 1.142          | 1.08          | -1.609         | -1.621        |
| CRLF1                 | cytokine receptor-like factor 1                                                                                   | NM_004750        | 1.188          | 1.028         | -4.345         | -4.678        |
| XIST                  | Homo sapiens X (inactive)-specific transcript (XIST) on chromosome X.                                             | NR_001564        | -1.003         | -1.083        | -2.919         | -3.185        |
