# Supplementary material for: PTCH1 +/− Dermal Fibroblasts Isolated from Healthy Skin of Gorlin Syndrome Patients Exhibit Features of Carcinoma Associated Fibroblasts
Source: PubMed Central journal article supplement (PMC2654107; doi:10.1371/journal.pone.0004818), 2009-03-16
Supplement: pone.0004818.s005.pdf [file pone.0004818.s005.pdf]

Table S4

| gene name | TaqMan® Gene Expression Assay Reference |
|-----------|-----------------------------------------|
| MMP1      | Hs00233958_m1                           |
| MMP3      | Hs00233962_m1                           |
| COL3A1    | Hs00943809_m1                           |
| COL7A1    | Hs00164310_m1                           |
| COL11A1   | Hs00266273_m1                           |
| LAMA2     | Hs00166308_m1                           |
| FGF7      | Hs00940253_m1                           |
| GREM1     | Hs00171951_m1                           |
| MGP       | Hs00179899_m1                           |
| CXCL12    | Hs00171022_m1                           |
| ANGPTL2   | Hs00765775_m1                           |
| ANGPTL4   | Hs00211522_m1                           |
| WNT5A     | Hs00180103_m1                           |
| SFRP2     | Hs00293258_m1                           |
| DKK3      | Hs00247426_m1                           |
| ID2       | Hs00747379_m1                           |
| WISP2     | Hs00180242_m1                           |
| TNC       | Hs01115664_m1                           |
| TBP       | Hs99999910_m1                           |
| GAPDH     | Hs99999905_m1                           |
| PPIA      | Hs99999904_m1                           |
| RPLO1     | Hs99999902_m1                           |
| B2M       | Hs99999907_m1                           |
